# Supplementary material
Source: HighWire-hosted journal article supplement (https://bmjopen.bmj.com/content/7/7/e014333)
Supplement: inline-supplementary-material-1 [file inline-supplementary-material-1.pdf]

Number of wards

7  
6  
5  
4  
3  
2  
1

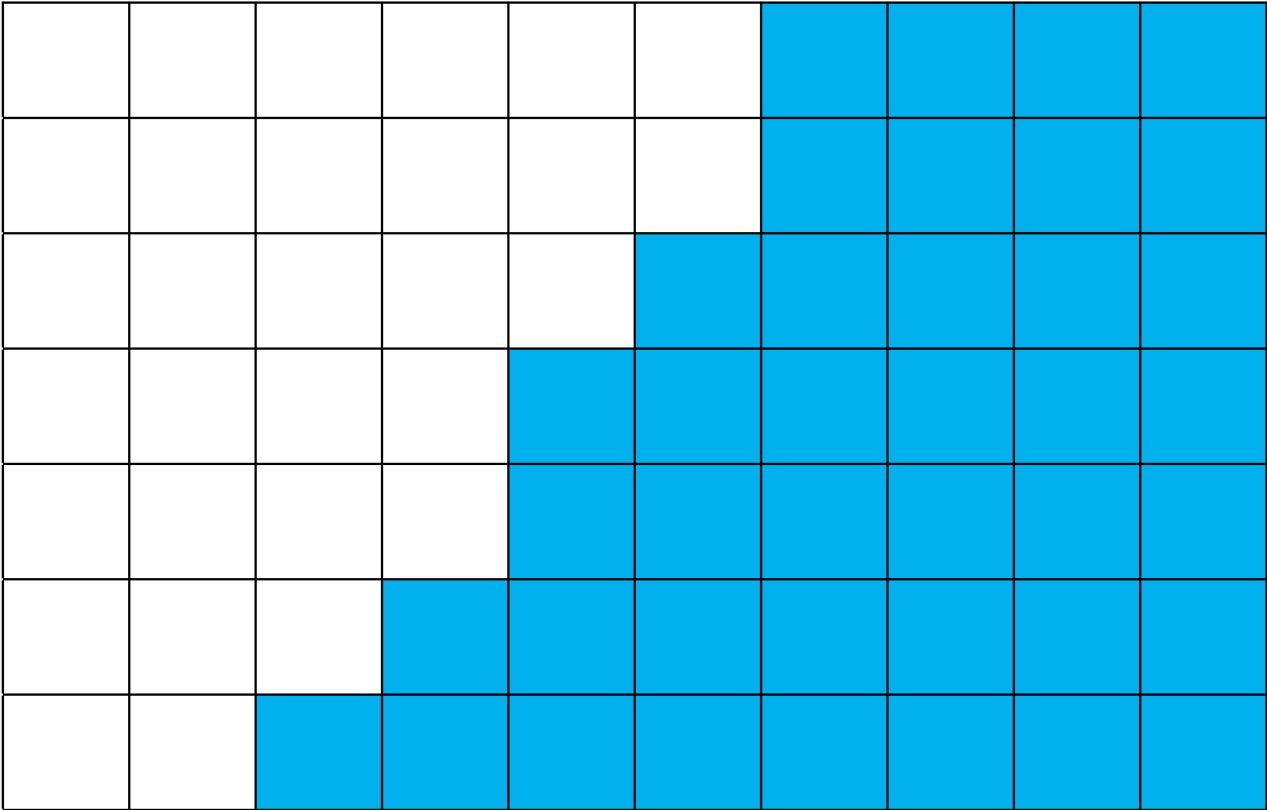

Aug '13    Oct '13    Dec '13    Feb '14    Apr '14    Jun '14    Aug '14    Oct '14    Dec '15    Feb '15
