# Supplementary material
Source: HighWire-hosted journal article supplement (https://bmjopen.bmj.com/content/7/7/e014333)
Supplement: inline-supplementary-material-2 [file inline-supplementary-material-2.pdf]

# What happened yesterday?

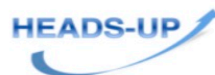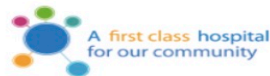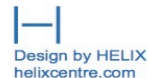

If a patient has been affected, please include their hospital number. Where there is nothing to report, write N/A in comments box.

**1**

## Review details

Ward:   
Scribe name:  Role:   
Date:

## Team members present

|                                 |                                     |                                         |                             |
|---------------------------------|-------------------------------------|-----------------------------------------|-----------------------------|
| <input type="checkbox"/> Clerk  | <input type="checkbox"/> OT         | <input type="checkbox"/> Discharge team | <input type="checkbox"/> CT |
| <input type="checkbox"/> HCA    | <input type="checkbox"/> Nurse      | <input type="checkbox"/> Consultant     | <input type="checkbox"/> F2 |
| <input type="checkbox"/> Physio | <input type="checkbox"/> Pharmacist | <input type="checkbox"/> SpR            | <input type="checkbox"/> F1 |

**2**

## Concerns

### Staffing levels

|                                  |                                             |
|----------------------------------|---------------------------------------------|
| <input type="checkbox"/> Medical | <input type="text" value="Comment or N/A"/> |
| <input type="checkbox"/> Nursing |                                             |
| <input type="checkbox"/> OT / PT |                                             |

### Equipment

|                                      |                                             |
|--------------------------------------|---------------------------------------------|
| <input type="checkbox"/> Unavailable | <input type="text" value="Comment or N/A"/> |
| <input type="checkbox"/> Not working |                                             |

### Services

|                                            |                                             |
|--------------------------------------------|---------------------------------------------|
| <input type="checkbox"/> Phlebotomy        | <input type="text" value="Comment or N/A"/> |
| <input type="checkbox"/> Echo              |                                             |
| <input type="checkbox"/> Radiology         |                                             |
| <input type="checkbox"/> Endoscopy         |                                             |
| <input type="checkbox"/> In-patient review |                                             |
| <input type="checkbox"/> Delayed           |                                             |
| <input type="checkbox"/> Too junior        |                                             |

### Missed results / diagnosis

**3**

## Events

### Handover / communication problem

### New hospital-acquired problem

|                                         |                               |                                 |
|-----------------------------------------|-------------------------------|---------------------------------|
| <input type="checkbox"/> Pressure ulcer | <input type="checkbox"/> UTI  | <input type="checkbox"/> C-Diff |
| <input type="checkbox"/> Pneumonia      | <input type="checkbox"/> MRSA | <input type="checkbox"/> Other  |

### Patient deterioration

|                                   |                                                 |
|-----------------------------------|-------------------------------------------------|
| <input type="checkbox"/> Sepsis   | <input type="checkbox"/> Arrhythmia             |
| <input type="checkbox"/> Delirium | <input type="checkbox"/> Seen by medical team   |
| <input type="checkbox"/> Fall     | <input type="checkbox"/> Seen by outreach / ICU |

### Death

|                                     |                                             |
|-------------------------------------|---------------------------------------------|
| <input type="checkbox"/> Expected   | <input type="text" value="Comment or N/A"/> |
| <input type="checkbox"/> Unexpected |                                             |

### Patient not discharged as expected

**4**

## Drug errors and other issues

|                                         |                                    |                                      |
|-----------------------------------------|------------------------------------|--------------------------------------|
| <input type="checkbox"/> Prescription   | <input type="checkbox"/> VTE       | <input type="checkbox"/> Antibiotics |
| <input type="checkbox"/> Administration | <input type="checkbox"/> Analgesia | <input type="checkbox"/> Nutrition   |

**5**

## What went really well?

**6**

## Who will...

|                                                    |                                          |
|----------------------------------------------------|------------------------------------------|
| Arrange senior review / outreach for sick patient? | <input type="text" value="Name or N/A"/> |
| Change a prescription?                             | <input type="text" value="Name or N/A"/> |
| Escalate equipment problem / discharge delay?      | <input type="text" value="Name or N/A"/> |
| Complete a DATIX?                                  | <input type="text" value="Name or N/A"/> |
| Log patient for M&M discussion?                    | <input type="text" value="Name or N/A"/> |
| Other?                                             | <input type="text" value="Name or N/A"/> |
